# Supplementary material for: Abnormal foveal morphology in carriers of oculocutaneous albinism
Source: PubMed Central journal article supplement (PMC10359511; doi:10.1136/bjophthalmol-2020-318192), 2022-04-04
Supplement: bjophthalmol-2020-318192supp002.pdf [file bjophthalmol-2020-318192supp002.pdf]

| Normal foveal structural features detectable using optical coherence tomography               |                                                                                                                | Illustration                                              |              |
|-----------------------------------------------------------------------------------------------|----------------------------------------------------------------------------------------------------------------|-----------------------------------------------------------|--------------|
| (a) Extrusion of plexiform layers<br>(b) Foveal pit<br>(c) OS lengthening<br>(d) ONL widening |                                                                                                                | RNFL— GCL—<br>IPL— INL—<br>OPL— ONL—<br>ELM— ISe—<br>RPE— |              |
| Grade of foveal hypoplasia                                                                    | Structural features detected on optical coherence tomography                                                   | Present or absent                                         | Illustration |
| 1a                                                                                            | (a) Extrusion of plexiform layers<br>(b) Foveal pit – Nearly normal<br>(c) OS lengthening<br>(d) ONL widening  | (a) Absent<br>(b) Present<br>(c) Present<br>(d) Present   |              |
| 1b                                                                                            | (a) Extrusion of plexiform layers<br>(b) Foveal pit – Shallow indent<br>(c) OS lengthening<br>(d) ONL widening | (a) Absent<br>(b) Present<br>(c) Present<br>(d) Present   |              |
| 2                                                                                             | (a) Extrusion of plexiform layers<br>(b) Foveal pit<br>(c) OS lengthening<br>(d) ONL widening                  | (a) Absent<br>(b) Absent<br>(c) Present<br>(d) Present    |              |
| 3                                                                                             | (a) Extrusion of plexiform layers<br>(b) Foveal pit<br>(c) OS lengthening<br>(d) ONL widening                  | (a) Absent<br>(b) Absent<br>(c) Absent<br>(d) Present     |              |
| 4                                                                                             | (a) Extrusion of plexiform layers<br>(b) Foveal pit<br>(c) OS lengthening<br>(d) ONL widening                  | (a) Absent<br>(b) Absent<br>(c) Absent<br>(d) Absent      |              |
| Atypical                                                                                      | (a) Extrusion of plexiform layers<br>(b) Foveal pit – Shallow<br>(e) ISe disruption                            | (a) Absent<br>(b) Present<br>(e) Present                  |              |

**Supplementary figure 1:** Foveal hypoplasia grading scheme by Rufai et al. (2020), adapted from Thomas et al. (2011)
